# Supplementary material
Source: PubMed Central journal article supplement (PMC7219601)
Supplement: NIHMS1582001-supplement-1.pdf [file NIHMS1582001-supplement-1.pdf]

**Figure S1**

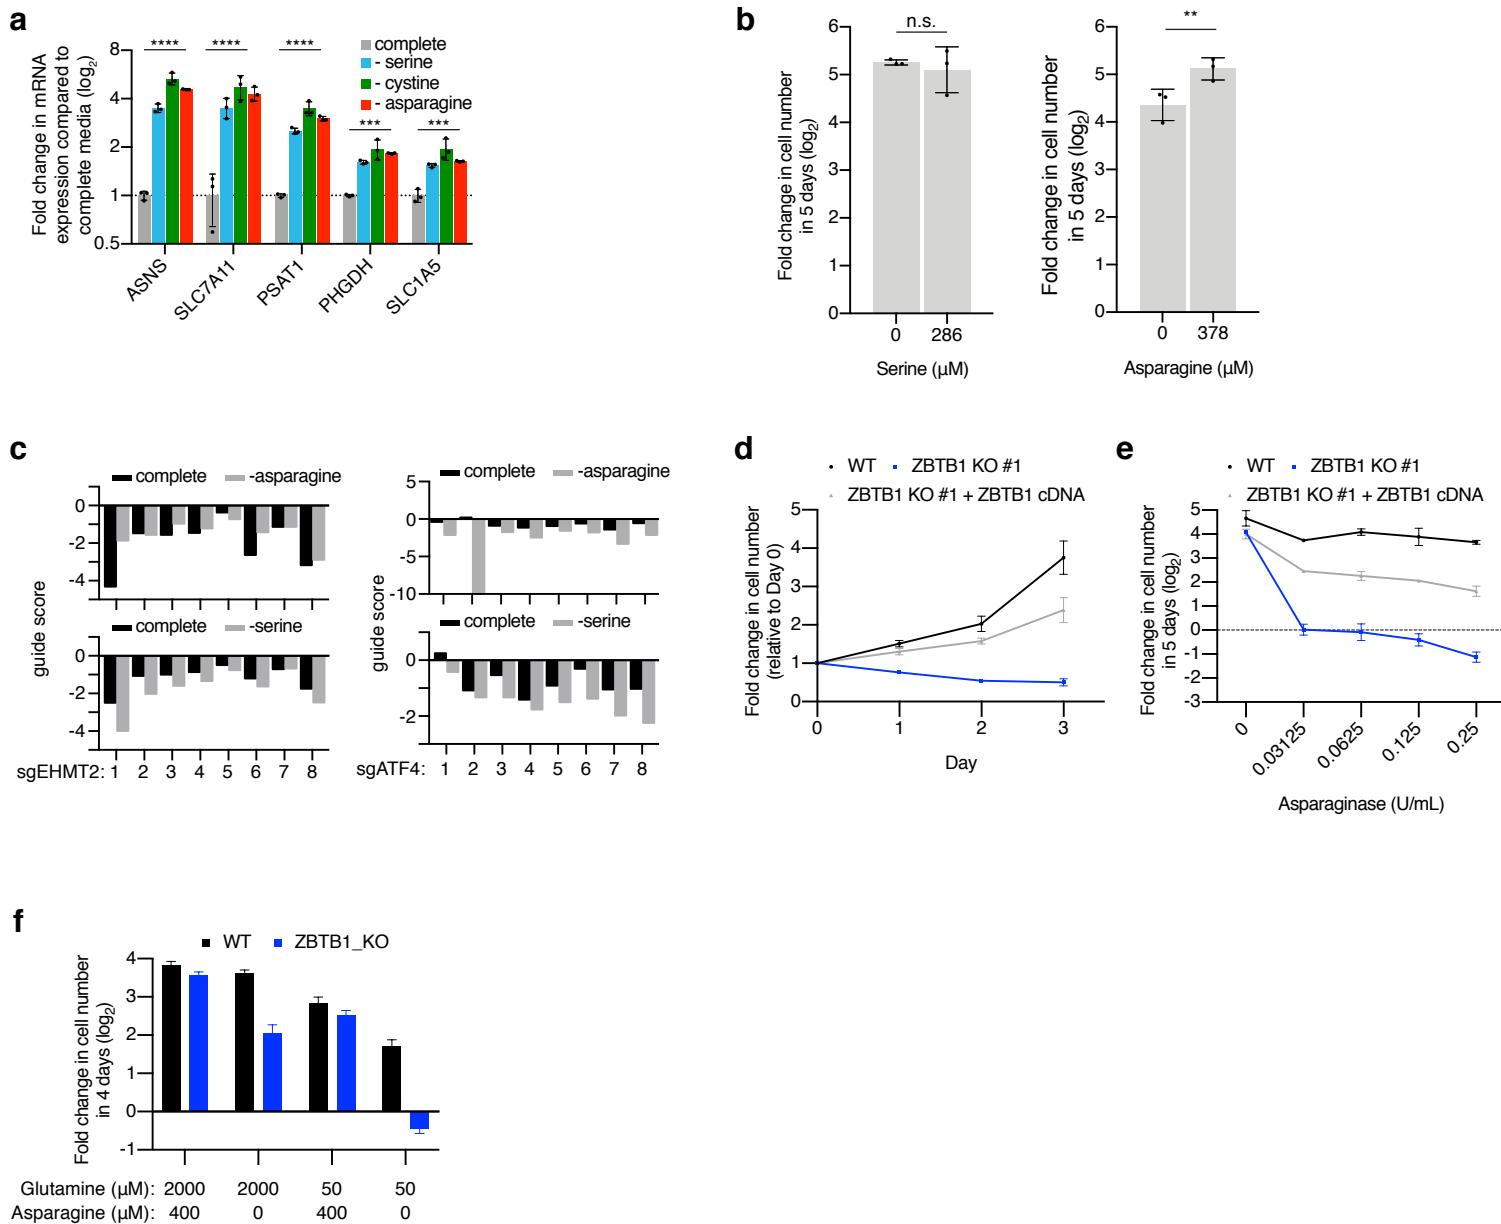

**Figure S2**

**a**

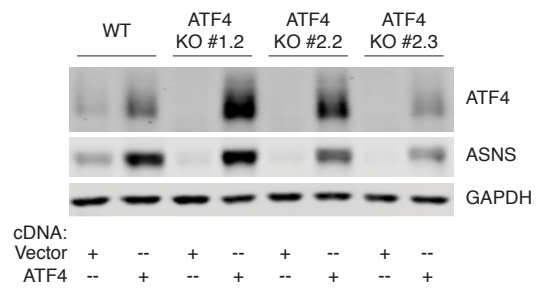

**b**

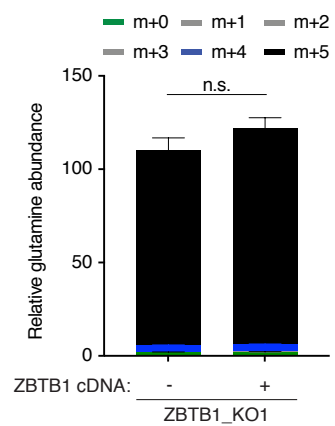

**Figure S3**

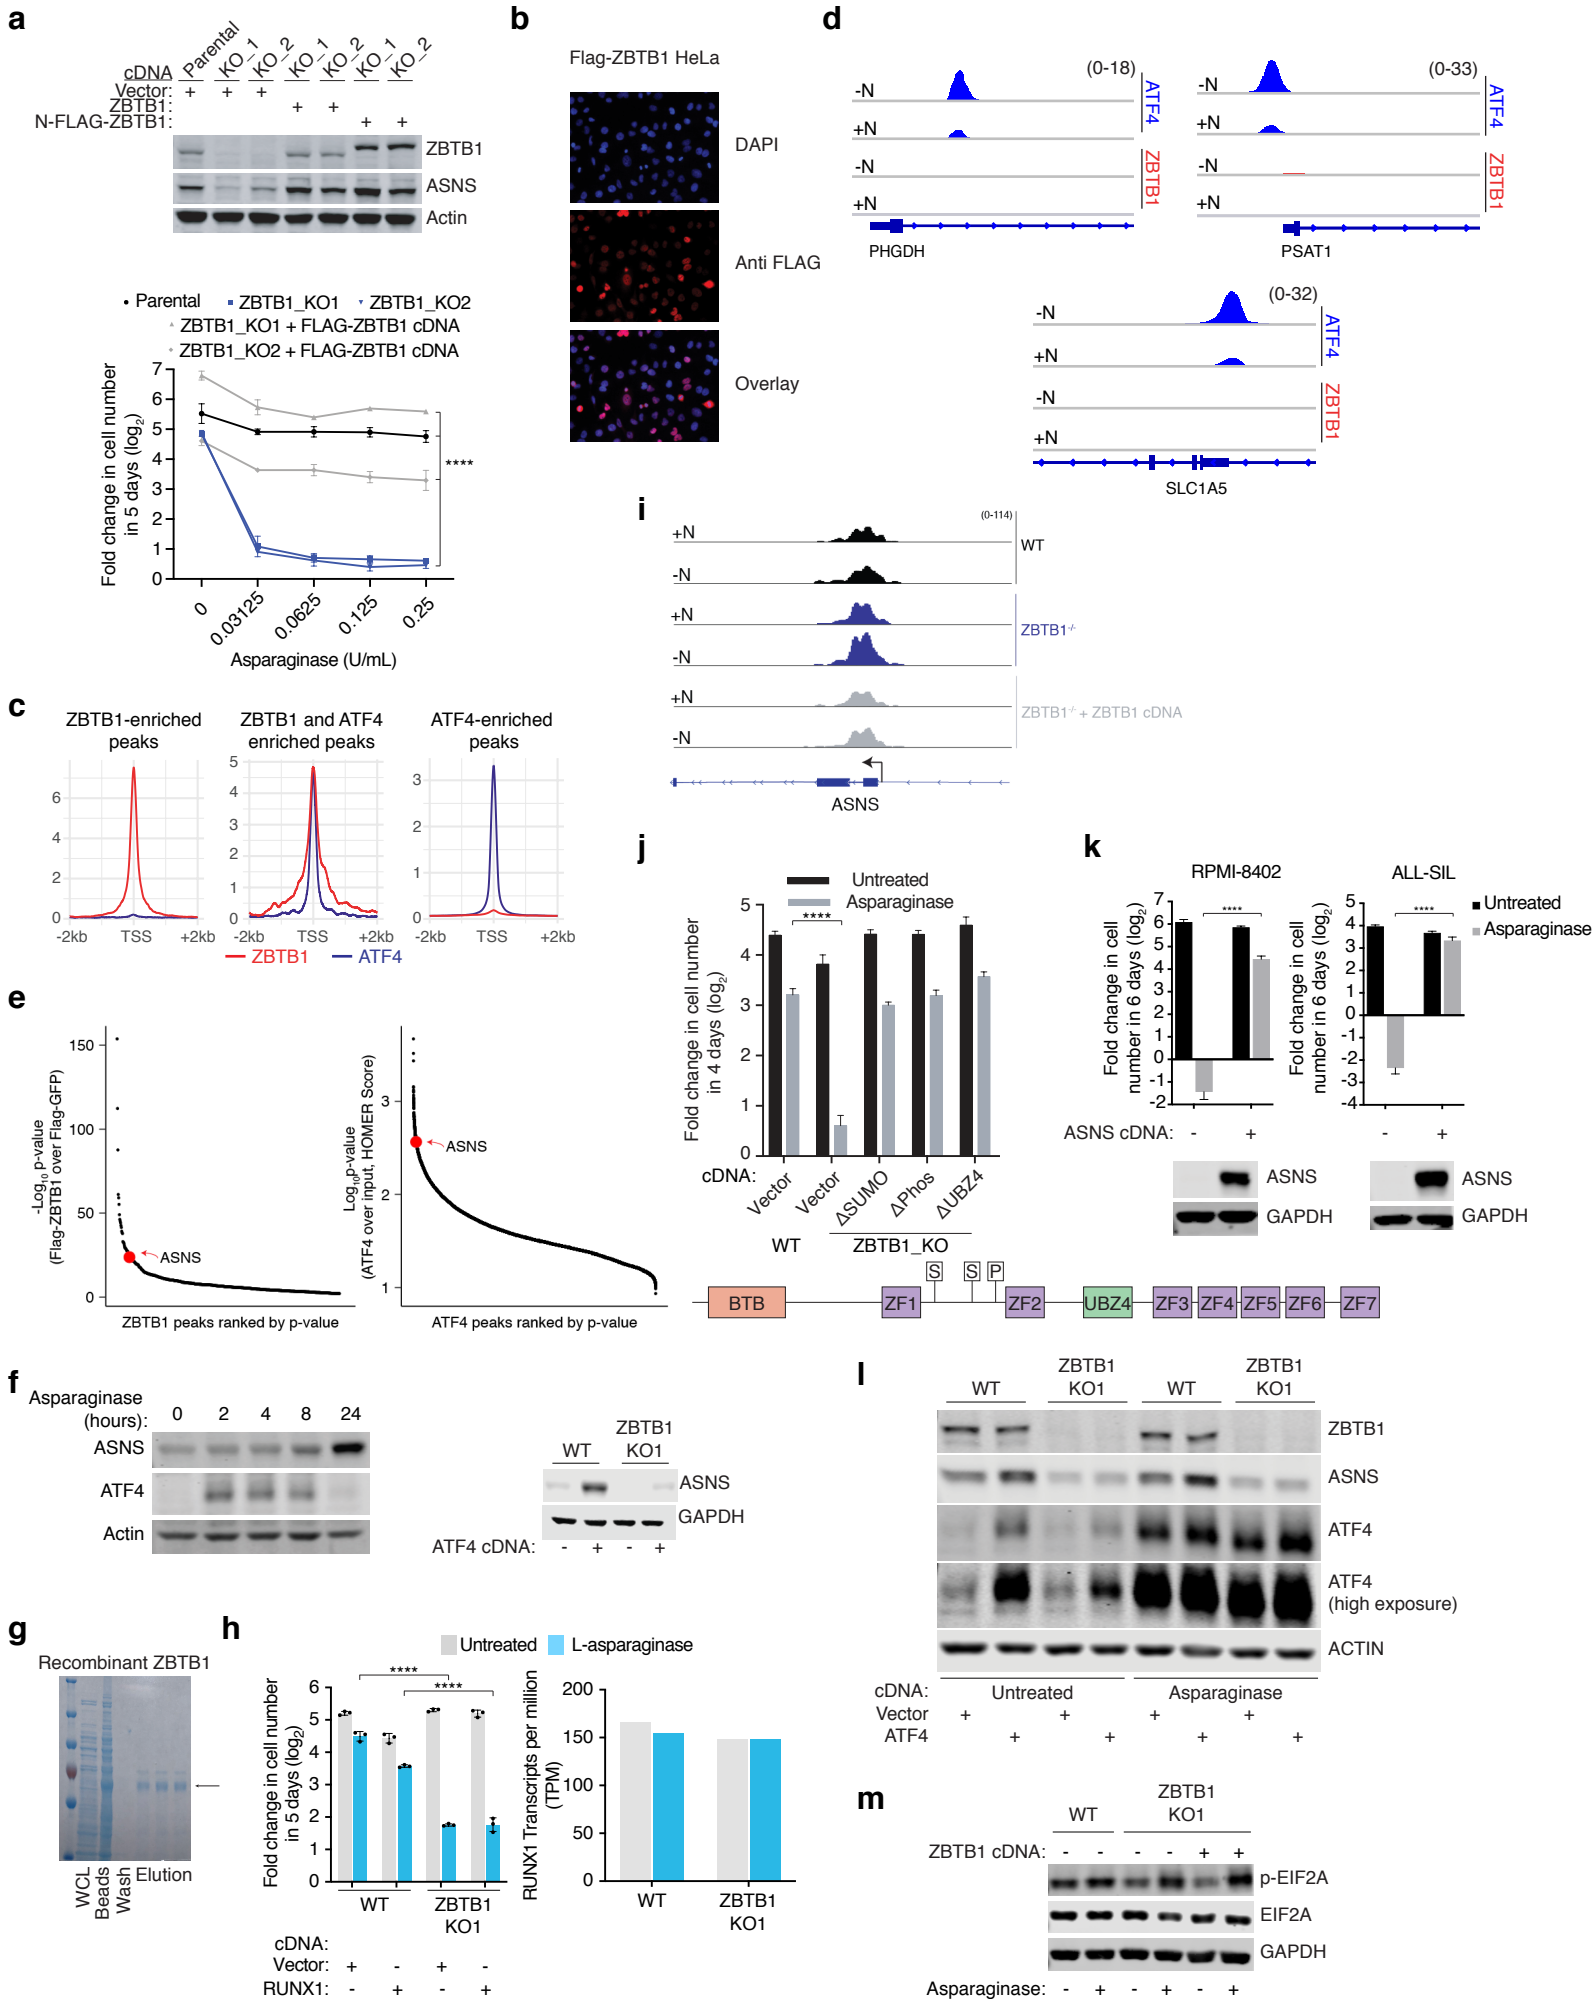

**Figure S4**

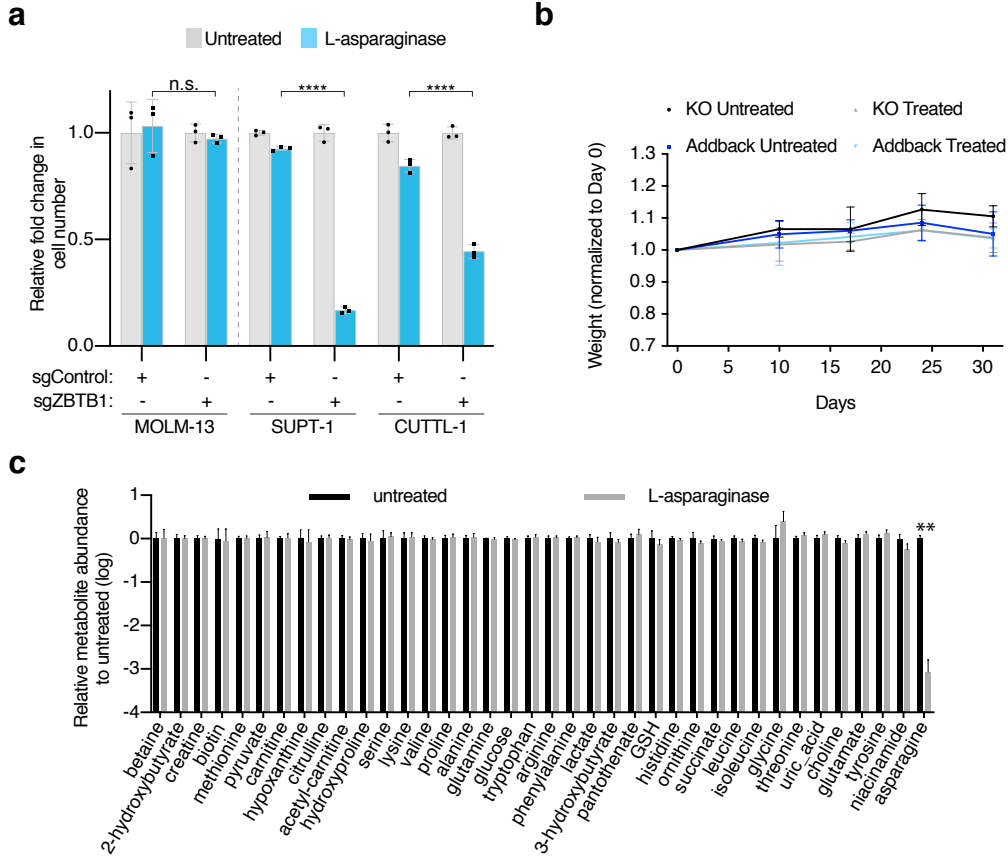

## Supplementary Figure legends:

### Figure S1. Related to Figure 1.

- A) Relative mRNA levels of indicated genes in parental Jurkat cells grown in complete (gray), serine-free (blue), cystine-free (green) or asparagine-free (red) media for eight hours (mean  $\pm$  SD, n=3).
- B) Fold change in cell number ( $\log_2$ ) of parental Jurkat cells after growth in media with indicated serine (left) or asparagine (right) concentrations for 5 days (mean  $\pm$  SD, n=3).
- C) Changes in the abundance of individual EHMT2 (left) or ATF4 (right) sgRNAs in complete media (gray) or absence (black) of asparagine (top) or serine (bottom).
- D) Fold change in cell number ( $\log_2$ ) of parental (black), ZBTB1 knockout (blue), and ZBTB1 knockout (gray) expressing ZBTB1 cDNA Jurkat cells after growth in HPLM treated with L-asparaginase (0.03125 U/mL) for the indicated number of days (mean  $\pm$  SD, n=3).
- E) Fold change in cell number ( $\log_2$ ) of parental (black), ZBTB1 knockout (blue), and ZBTB1 knockout (gray) expressing ZBTB1 cDNA Jurkat cells after growth in HPLM with the indicated concentration of L-asparaginase for 5 days (mean  $\pm$  SD, n=3).
- F) Fold change in cell number ( $\log_2$ ) of parental (black), ZBTB1 knockout mixed population (blue) Jurkat cells after growth in in media with indicated glutamine and asparagine concentrations for 4 days (mean  $\pm$  SD, n=3).

### Figure S2. Related to Figure 2.

- A) Immunoblot analysis of parental, ATF4 knockout, and ATF4 knockout expressing ATF4 cDNA Jurkat cells, as indicated. GAPDH was used as a loading control.
- B) Abundance of labeled glutamine in ZBTB1 knockout or ZBTB1 knockout cells expressing ZBTB1 cDNA Jurkat cells cultured for 8 hours in media containing [U-13C]-glutamine (2000  $\mu$ M) in the absence of asparagine. Colors indicate mass isotopomers, as indicated (mean  $\pm$  SD, n=3).

### Figure S3. Related to Figure 3.

- A) Immunoblot analysis of parental, ZBTB1 knockout, and ZBTB1 knockout expressing ZBTB1 or N-FLAG ZBTB1 cDNA Jurkat cells, as indicated. Actin was used as a loading control (top). Fold change in cell number ( $\log_2$ ) of indicated Jurkat cells after growth in media with indicated L-asparaginase concentrations for 5 days (mean  $\pm$  SD, n=3).
- B) Immunofluorescent microscopy images of HeLa cells expressing Flag-ZBTB1 cDNA after growth in 50  $\mu$ M or 2mM glutamine, as indicated. Cells were stained with DAPI (top), an anti-FLAG antibody and anti-mouse secondary antibody (middle), and the two images were overlaid (bottom).
- C) Enrichment of ZBTB1 (red) or ATF4 (blue) at the transcription start site (TSS) of ZBTB1, ATF4 or ZBTB1 and ATF4 overlapping peaks.
- D) ChIP-Seq tracks near the PHGDH (top), PSAT1 (middle) and SLC1A5 (bottom) promoters for ATF4 (blue) or ZBTB1 (red) in FLAG-ZBTB1 expressing ZBTB1 knockout cells in the presence (+N) or absence (-N) of asparagine.

- E) Peaks for ZBTB1 (left) and ATF4 (right) ranked by p-value, relative to input (ATF4) and FLAG-ZBTB1 relative to FLAG-GFP both relative to input (ZBTB1). Peaks enriched within the promoter of ASNS are indicated in red.
- F) Immunoblot analysis of parental Jurkat cells treated with L-asparaginase (0.25 U/mL) for the indicated number of hours (top). Actin was used as a loading control. Immunoblot analysis of parental or ZBTB1 knockout cells expressing indicated cDNA (bottom). GAPDH was used as a loading control.
- G) SDS-PAGE of recombinant zinc-finger domain of ZBTB1 expressed in bacteria. Whole cell lysate (WCL), anti-His beads, wash, and elution samples are indicated. Expected purified protein is indicated (arrow).
- H) Fold change in cell number ( $\log_2$ ) of parental or ZBTB1 knockout Jurkat cells expressing vector or RUNX1 cDNA after treatment with L-asparaginase (0.03U/mL) or left untreated for 5 days (mean  $\pm$  SD, n=3, left). RUNX1 transcripts per million (TPM) in parental or ZBTB1 knockout Jurkat cells.
- I) ATAC-Seq tracks near the promoter of ASNS in parental, ZBTB1 knockout, and ZBTB1 knockout expressing ZBTB1 cDNA Jurkat cells in the presence (+N) or absence (-N) of asparagine, as indicated.
- J) Schematic of the protein structure of ZBTB1 including the broad complex, tramtrack, and bric-a-brac (BTB) domain, zinc fingers 1-7 (ZF), ubiquitin-binding zinc finger domain (UBZ4) (top). Fold change in cell number ( $\log_2$ ) of parental or ZBTB1 knockout Jurkat cells expressing indicated cDNAs after treated with asparaginase (0.25 U/mL, gray) or left untreated (black) for 4 days (mean  $\pm$  SD, n=3).
- K) Fold change in cell number ( $\log_2$ ) of RPMI-8402 (left) or ALL-SIL (right) cells expressing vector or ASNS cDNA after treatment with L-asparaginase (0.25 U/mL, gray) or no treatment (black) for 6 days (mean  $\pm$  SD, n=3, top). Immunoblot analysis of cells lines with indicated antibodies. GAPDH was used as a loading control.
- L) Immunoblot analysis of parental and ZBTB1 knockout Jurkat cells grown in HPLM left untreated or treated with L-asparaginase and expressing vector or ATF4 cDNA, as indicated. Actin was used as a loading control.
- M) Immunoblot analysis of parental, ZBTB1 knockout and ZBTB1 knockout expressing ZBTB1 cDNA Jurkat cells grown in HPLM treated with L-asparaginase, as indicated. GAPDH was used as a loading control.

**Figure S4. Related to Figure 4.**

- A) Relative fold change in cell number of indicated cell lines expressing ZBTB1 sgRNA or vector control after growth in HPLM treated with L-asparaginase (0.03125 U/mL) for five days (mean  $\pm$  SD, n=3).
- B) Weight of mice with the indicated engrafted cells and treatment at the indicated day normalized to their initial weight (mean  $\pm$  SD, n=7).
- C) Relative abundance of indicated metabolites in the serum of mice treated with L-asparaginase (1000 U/kg, gray) or left untreated (black).

Statistics: two-tailed unpaired *t*-test. \*\**P*<0.05, \*\*\**P*<0.01, \*\*\*\**P*<0.001
